# Supplementary material for: Evaluation of the impact of a mobile health system on adherence to antenatal and postnatal care and prevention of mother-to-child transmission of HIV programs in Kenya
Source: Springer Nature journal article supplement (doi:10.1186/s12889-015-1358-5), 2015-02-06

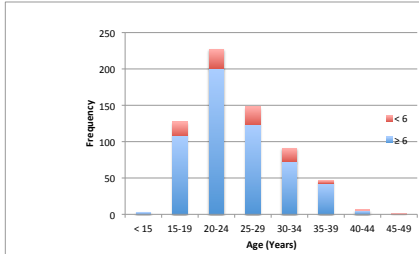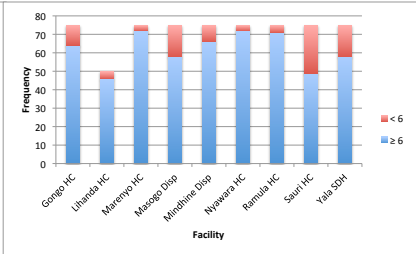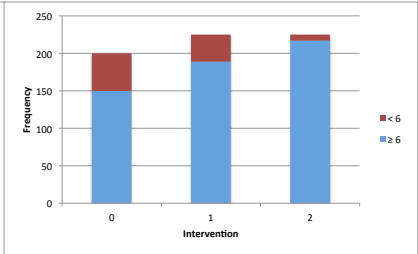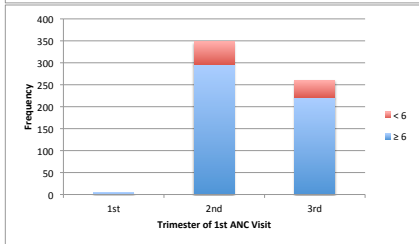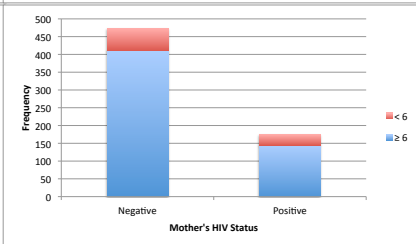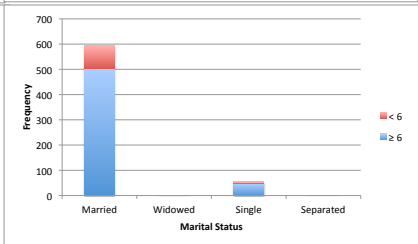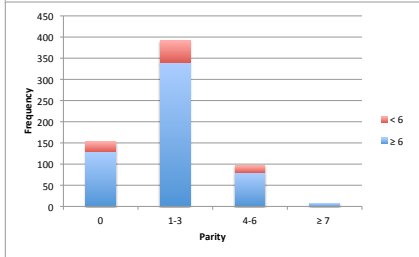

Supplement: MOESM5 [file 9748542]
